# Supplementary material for: Comparative Transcriptomics of Multi-Stress Responses in Pachycladon cheesemanii and Arabidopsis thaliana
Source: MDPI journal article supplement (doi:10.3390/ijms241411323), 2023-07-11
Supplement: s1 [file s1]

**Table S1. Summary of read data for *P. cheesemanii* stress transcriptome.**

| <b>Library</b> | <b>Raw reads</b> | <b>Clean reads</b> | <b>Raw data (GB)</b> | <b>Clean data (GB)</b> |
|----------------|------------------|--------------------|----------------------|------------------------|
| <b>Control</b> | 115,407,011      | 115,383,228        | 32.24                | 32.24                  |
| <b>UV-B</b>    | 99,224,069       | 99,204,290         | 27.72                | 27.72                  |
| <b>Cold</b>    | 111,242,384      | 111,202,228        | 31.08                | 31.07                  |
| <b>Salt</b>    | 111,282,532      | 111,236,246        | 31.09                | 31.08                  |
| <b>Total</b>   | 437,155,996      | 437,025,992        | 122.13               | 122.11                 |

**Table S2. Assessment of transcriptome assemblies generated by multiple assemblers.**

|                     | k-mer size | Bowtie (%) | Complete<br>BUSCOs (%) | Fragmented<br>BUSCOs (%) | Missing<br>BUSCOs (%) |
|---------------------|------------|------------|------------------------|--------------------------|-----------------------|
| <b>Velvet/Oases</b> | k55        | 88.21      | 92.7                   | 4.5                      | 2.8                   |
|                     | k65        | 87.84      | 96.1                   | 1.9                      | 2                     |
|                     | k75        | 87.56      | 97.1                   | 1.3                      | 1.6                   |
|                     | k85        | 86.64      | 96.9                   | 1.4                      | 1.7                   |
|                     | k95        | 85.9       | 96.4                   | 2.1                      | 1.5                   |
| <b>Trans-ABYSS</b>  | k51        | 90.79      | 92.5                   | 4.4                      | 3.1                   |
|                     | k53        | 90.88      | 92.8                   | 4.4                      | 2.8                   |
|                     | k55        | 90.98      | 93.1                   | 4                        | 2.9                   |
|                     | k57        | 91.08      | 93.8                   | 3.5                      | 2.7                   |
|                     | k59        | 91.4       | 94.3                   | 3.5                      | 2.2                   |
|                     | k61        | 91.21      | 94                     | 3.5                      | 2.5                   |
|                     | k63        | 91.25      | 94.1                   | 3.5                      | 2.4                   |
| <b>Trinity</b>      | k19        | 88.81      | 59.9                   | 24.4                     | 15.7                  |
|                     | k21        | 88.72      | 84.5                   | 9.4                      | 6.1                   |
|                     | k23        | 88.62      | 89.4                   | 7.2                      | 3.4                   |
|                     | k25        | 88.26      | 86.3                   | 8                        | 5.7                   |
|                     | k27        | 88.68      | 87                     | 7.4                      | 5.6                   |
|                     | k29        | 89.41      | 88.1                   | 8.1                      | 3.8                   |
|                     | k31        | 89.86      | 88.6                   | 7.1                      | 4.3                   |

**Table S3. Summary statistics for transcriptome assembly.**

| Assembly                                        |             |
|-------------------------------------------------|-------------|
| Trans-ABYSS transcripts (combined 7 assemblies) | 318,111     |
| CAP3 transcripts                                | 223,341     |
| EvidentialGene transcripts                      | 67,905      |
| EvidentialGene genes                            | 45,911      |
| Minimum transcript length (bp)                  | 200         |
| Longest transcript length (bp)                  | 18,443      |
| Final size of assembly (bp)                     | 107,064,440 |
